# Supplementary material
Source: PubMed Central journal article supplement (PMC3113253)
Supplement: mmc1.pdf [file mmc1.pdf]

**Supplemental Data**

**American Journal of Human Genetics, Volume 88**

**Adaptor Protein Complex 4 Deficiency Causes Severe  
Autosomal-Recessive Intellectual Disability, Progressive  
Spastic Paraplegia, Shy Character, and Short Stature**

**Rami Abou Jamra, Orianne Philippe, Annick Raas-Rothschild, Sebastian H.  
Eck, Elisabeth Graf, Rebecca Buchert, Arif Ekici, Felix F. Brockschmidt, Markus  
M. Nöthen, Arnold Munnich, Tim M. Strom, Andre Reis, and Laurence Colleaux**

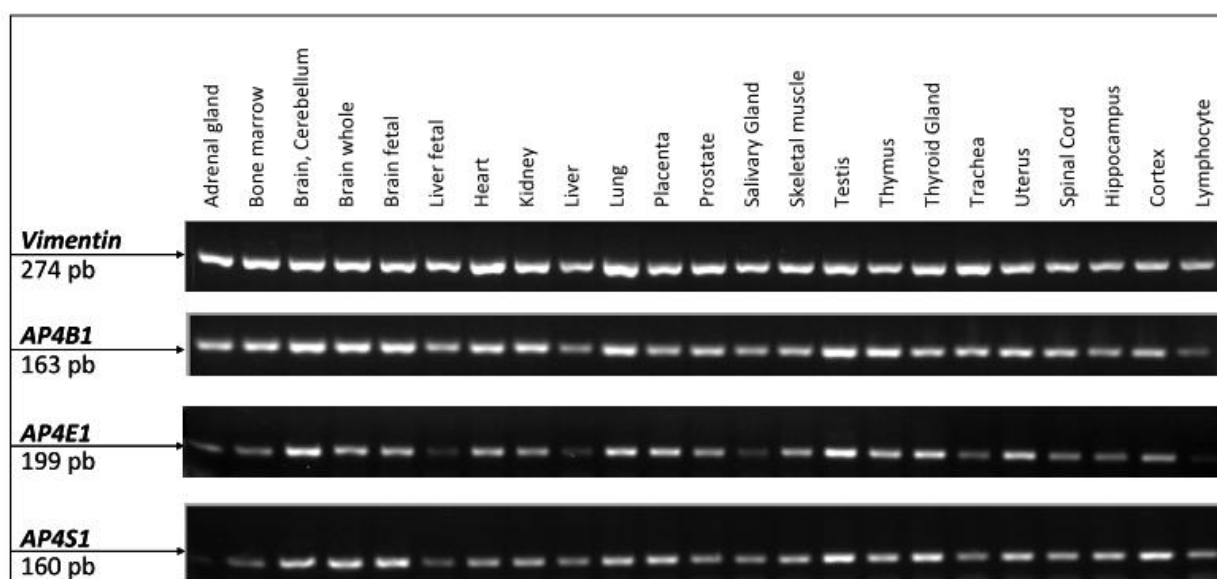

**Figure S1. Expression Profile of the AP4 Genes**

Expression analysis of *AP4B1*, *AP4E1*, *AP4S1* and Vimentin. Expression was assayed by RT-PCR on adult and fetal total RNA isolated from various tissues (Clontech). Amplicon lengths are indicated in bp.

**Table S1. Summary of the Linkage Results**

|              | candidate region | start SNP  | end SNP   | start bp    | end bp      | LOD score | length mb | #RefSeq genes* | identified mutation                                                |
|--------------|------------------|------------|-----------|-------------|-------------|-----------|-----------|----------------|--------------------------------------------------------------------|
| <b>ID01</b>  | 1p13.2q21.2      | rs692982   | rs1868992 | 112,380,534 | 149,908,108 | 2.66      | 37.5      | 150            | <i>AP4B1</i> ;NM_006594.2:c.487_488insTAT;p.Glu163_Ser739delinsVal |
| <b>MR061</b> | 14q11-q12        | rs10132585 | rs1278951 | 22,399,285  | 31,493,380  | 3.85      | 9.1       | 94             | <i>AP4S1</i> ;NM_007077.3:c.124C>T, NP_009008.2:p.Arg42*           |
| <b>MR071</b> | 15q21.1-q25.1    | rs28464106 | rs1867315 | 44,082,523  | 77,056,789  | 3.32      | 33.0      | 290            | <i>AP4E1</i> ;NM_007347.3:c.542+1_542+4delGTAA, r.543_702del       |

\* according to UCSC
